# Supplementary material for: Development of a colorimetric α-ketoglutarate detection assay for prolyl hydroxylase domain (PHD) proteins
Source: PubMed Central journal article supplement (PMC7961094; doi:10.1016/j.jbc.2021.100397), 2021-02-08
Supplement: mmc1.pdf [file mmc1.pdf]

## Development of a colorimetric $\alpha$ -ketoglutarate detection assay for prolyl hydroxylase domain (PHD) proteins

Samantha J. Wong<sup>1</sup>, Alison E. Ringel<sup>1</sup>, William Yuan<sup>2</sup>, Joao A Paulo<sup>1</sup>, Haejin Yoon<sup>1</sup>, Mark A. Currie<sup>1,3</sup>, Marcia C. Haigis<sup>1\*</sup>

<sup>1</sup>Department of Cell Biology, Blavatnik Institute, Harvard Medical School, Boston, Massachusetts

<sup>2</sup>Department of Biomedical Informatics, Harvard Medical School, Boston, Massachusetts.

<sup>3</sup>Department of Biology, University of Toronto Mississauga, Mississauga, Ontario, Canada; Department of Cell & Systems Biology, University of Toronto, Toronto, Ontario, Canada.

\*Corresponding author: Marcia C. Haigis

E-mail: [marcia\\_haigis@hms.harvard.edu](mailto:marcia_haigis@hms.harvard.edu)

**Running title:** A colorimetric  $\alpha$ -ketoglutarate detection assay using 2,4-dinitrophenylhydrazine

**Keywords:** prolyl hydroxylase, *in vitro* hydroxylation,  $\alpha$  -ketoglutarate-dependent dioxygenases, high throughput assay, enzyme kinetics, 2,4-dinitrophenylhydrazine

### **List of Supplementary Figures**

|                              |      |
|------------------------------|------|
| Supplementary Figure S1..... | S-2  |
| Supplementary Figure S2..... | S-3  |
| Supplementary Figure S3..... | S-4  |
| Supplementary Figure S4..... | S-5  |
| Supplementary Figure S5..... | S-8  |
| Supplementary Figure S6..... | S-10 |
| Supplementary Figure S7..... | S-11 |

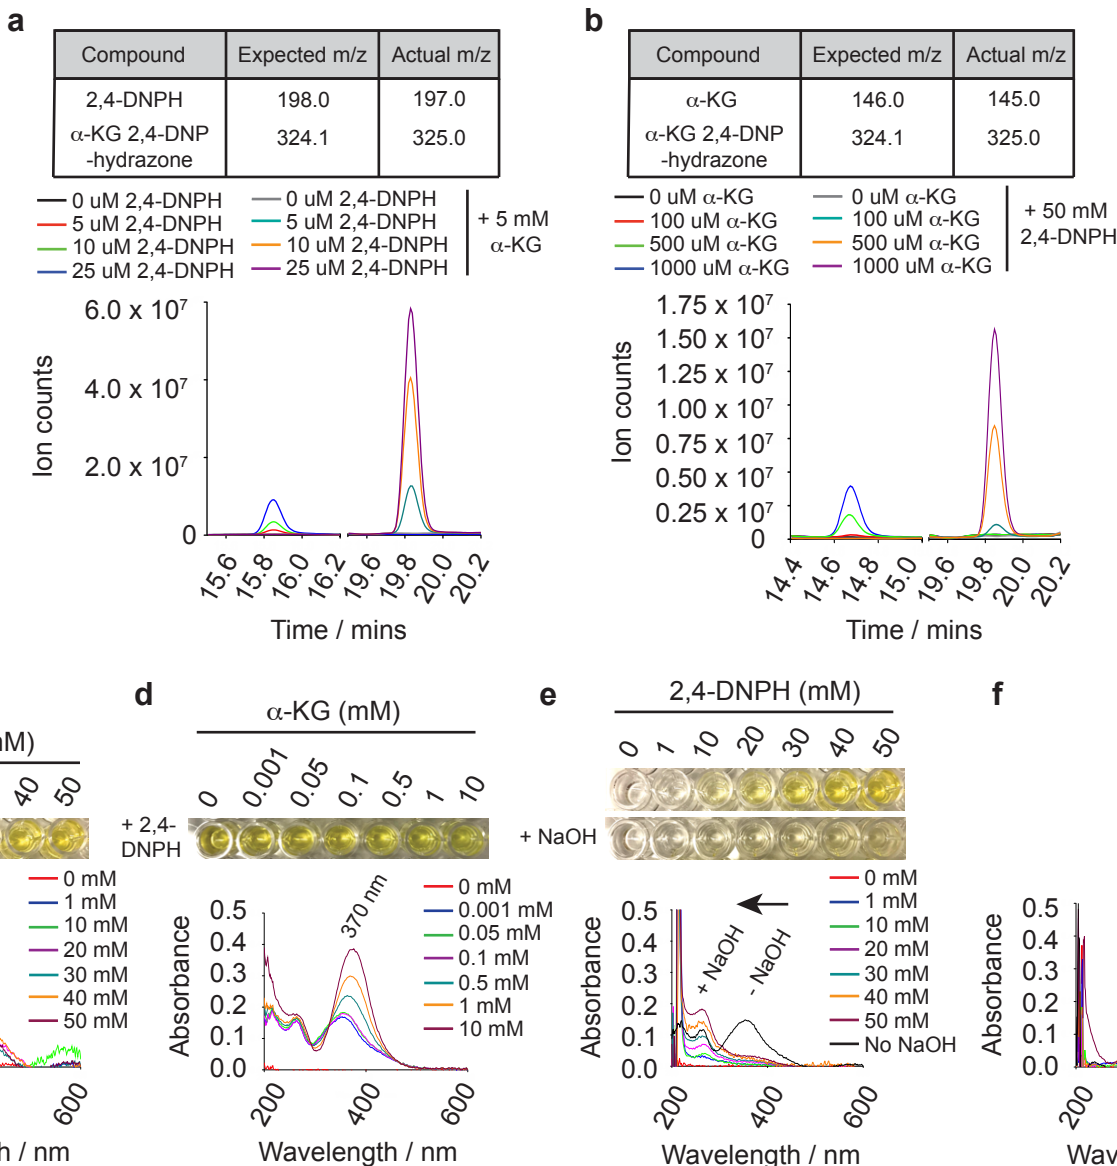

### Supplementary Figure S1

(a) Ion counts detected by metabolic liquid chromatography-mass spectrometry of increasing 2,4-DNPH alone and increasing 2,4-DNPH in the presence of 5 mM  $\alpha$ -ketoglutarate. (b) Ion counts detected by metabolic liquid chromatography-mass spectrometry of increasing  $\alpha$ -ketoglutarate alone and increasing  $\alpha$ -ketoglutarate in the presence of 50 mM 2,4-DNPH. (c) Wavelength absorption of increasing 2,4-DNPH concentrations. Panel of wells above graph shows a representative color gradient of increasing 2,4-DNPH concentrations. (d) Wavelength absorption of increasing  $\alpha$ -ketoglutarate concentration in the presence of 50 mM 2,4-DNPH. Panel of wells above graph shows a representative color gradient of increasing  $\alpha$ -ketoglutarate in the presence of 50 mM 2,4-DNPH. (e) Wavelength absorption of increasing 2,4-DNPH concentrations in the presence of 2 M NaOH. Panel of wells above graph shows a representative change in color gradient of increasing 2,4-DNPH concentrations before (top) and after (bottom) addition of 2 M NaOH to the panel of wells in S1c. (f) Wavelength absorption of increasing  $\alpha$ -ketoglutarate 2,4-DNP-hydrazone in the presence of 2 M NaOH.  $\alpha$ -KG,  $\alpha$ -ketoglutarate; 2,4-DNPH, 2,4-dinitrophenylhydrazine; NaOH, sodium hydroxide.

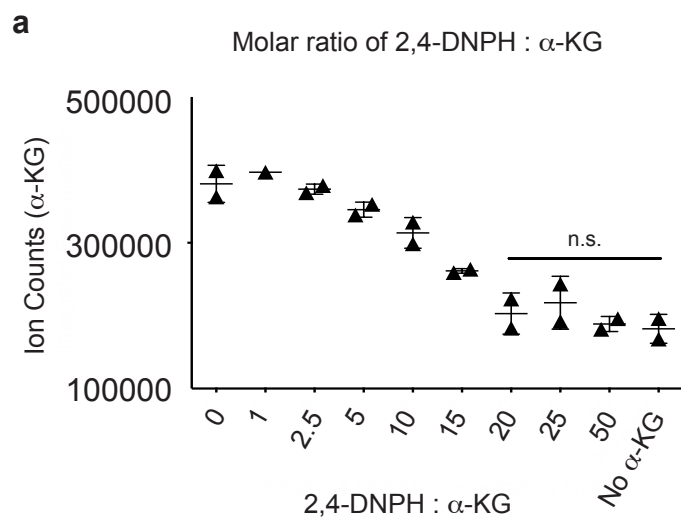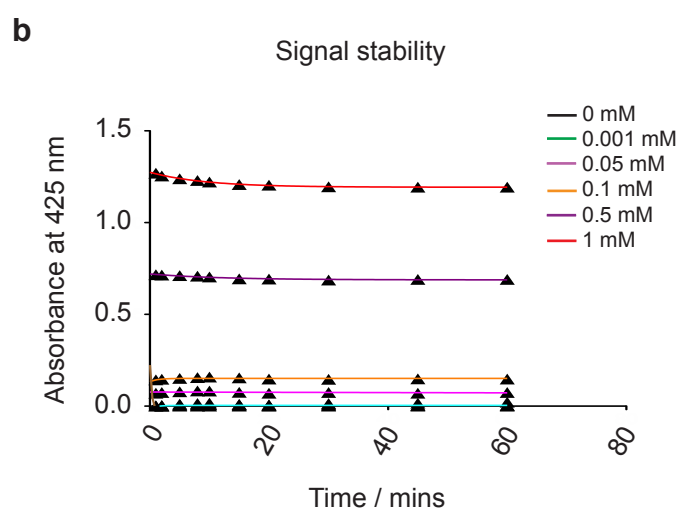

### Supplementary Figure S2

(a) Molar ratio of 2,4-DNPH needed to fully react with 1 mM of  $\alpha$ -ketoglutarate, verified by metabolite liquid chromatography coupled with mass spectrometry (n.s. with two-tailed T-test,  $p < 0.05$ ,  $n = 2$ ). (b) Signal stability of increasing  $\alpha$ -ketoglutarate 2,4-DNP-hydrazone in 2 M NaOH (n.s. with Student's T-test,  $p < 0.05$ ,  $n = 3$ ).  $\alpha$ -KG,  $\alpha$ -ketoglutarate; 2,4-DNPH, 2,4-dinitrophenylhydrazine; NaOH, sodium hydroxide.

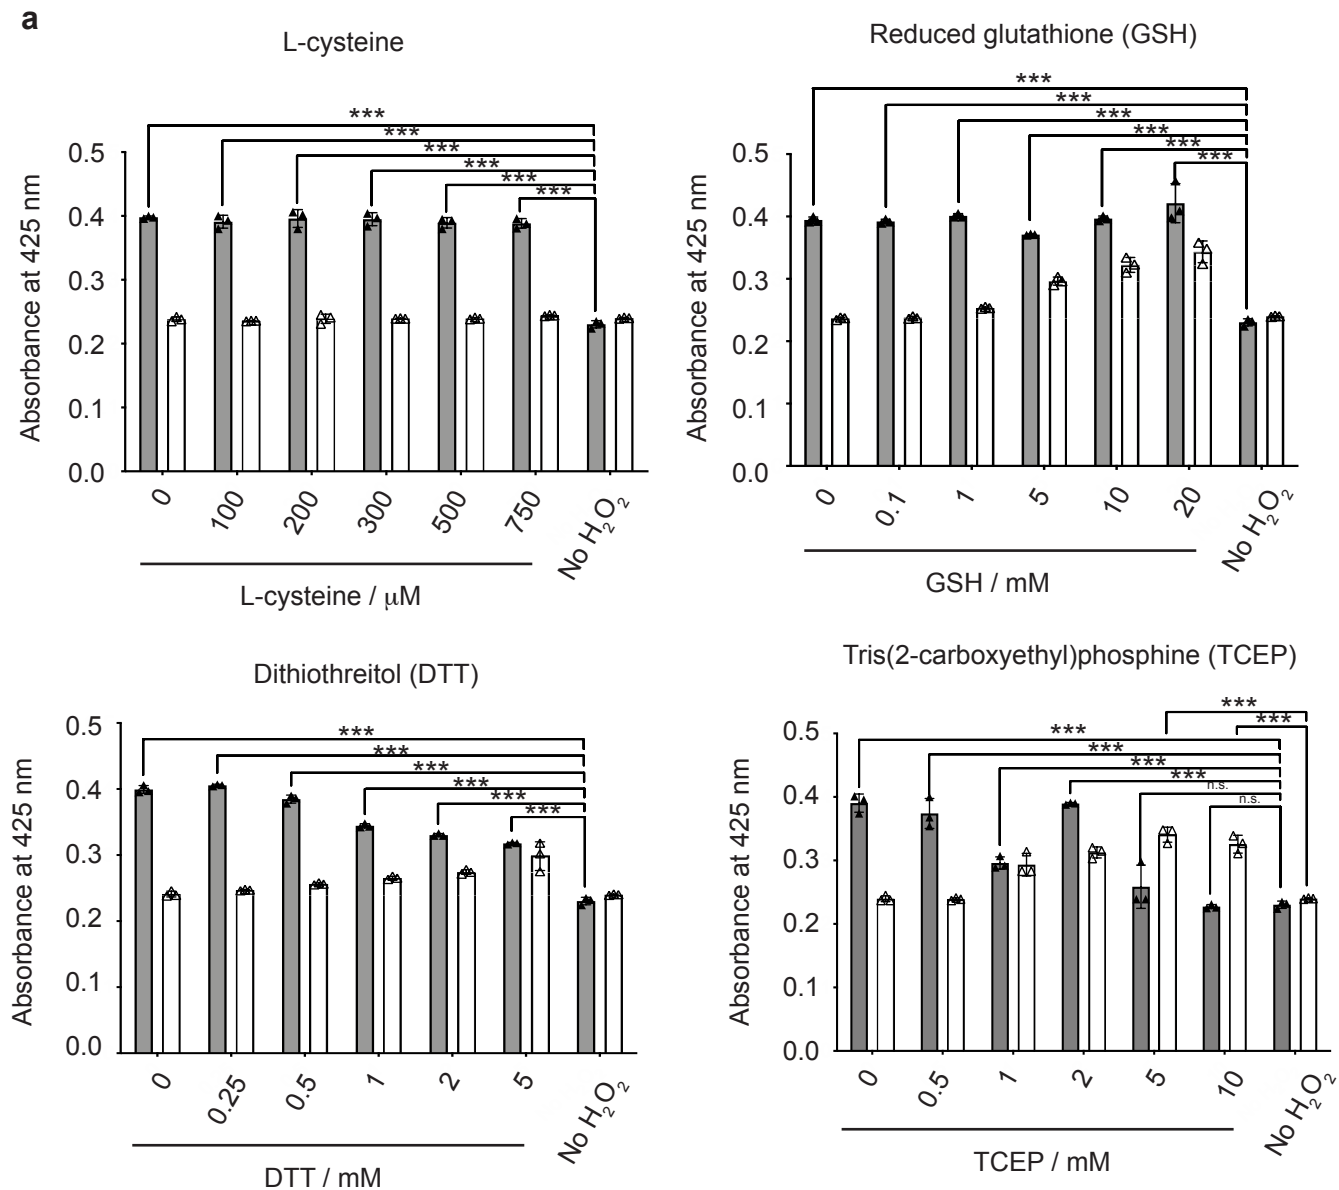

### Supplementary Figure S3

(a) Oxidative stress generated during the hydroxylation reaction by PHD3 was simulated using a physiological concentration of 25 mM of  $\text{H}_2\text{O}_2$ , which would form dehydroascorbic acid (that contains carbonyls) that reacts with 2,4-DNPH. Common reducing agents such as L-cysteine, glutathione (GSH), dithiothreitol (DTT), and tris(2-carboxyethyl)phosphine (TCEP) was added in in increasing concentrations to assess their respective abilities to relieve the oxidative stress generated by the reaction that would oxidize ascorbic acid (Student's T-test, \*\*\* $p < 0.001$ ,  $n = 3$ ).

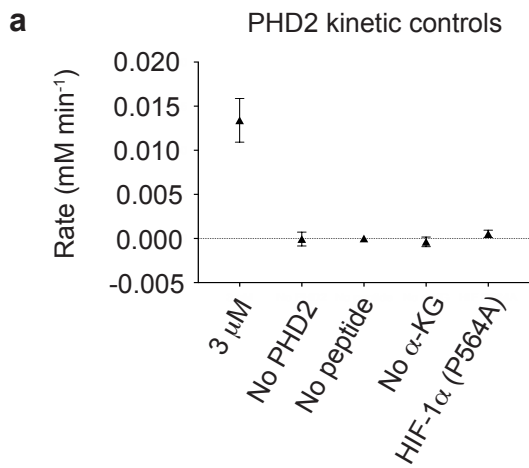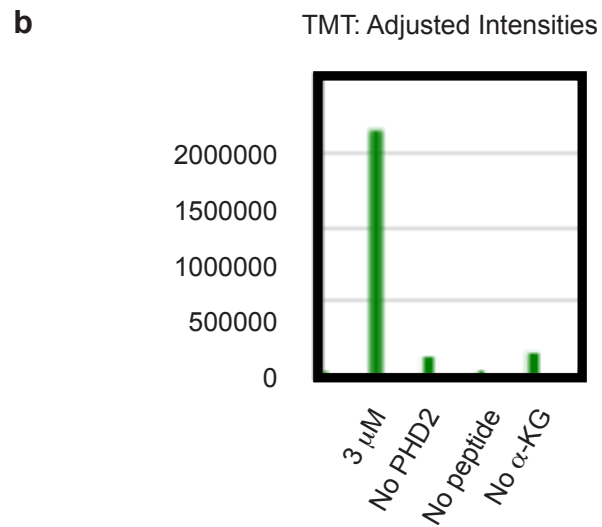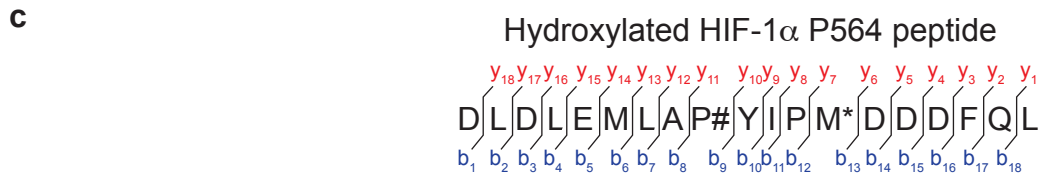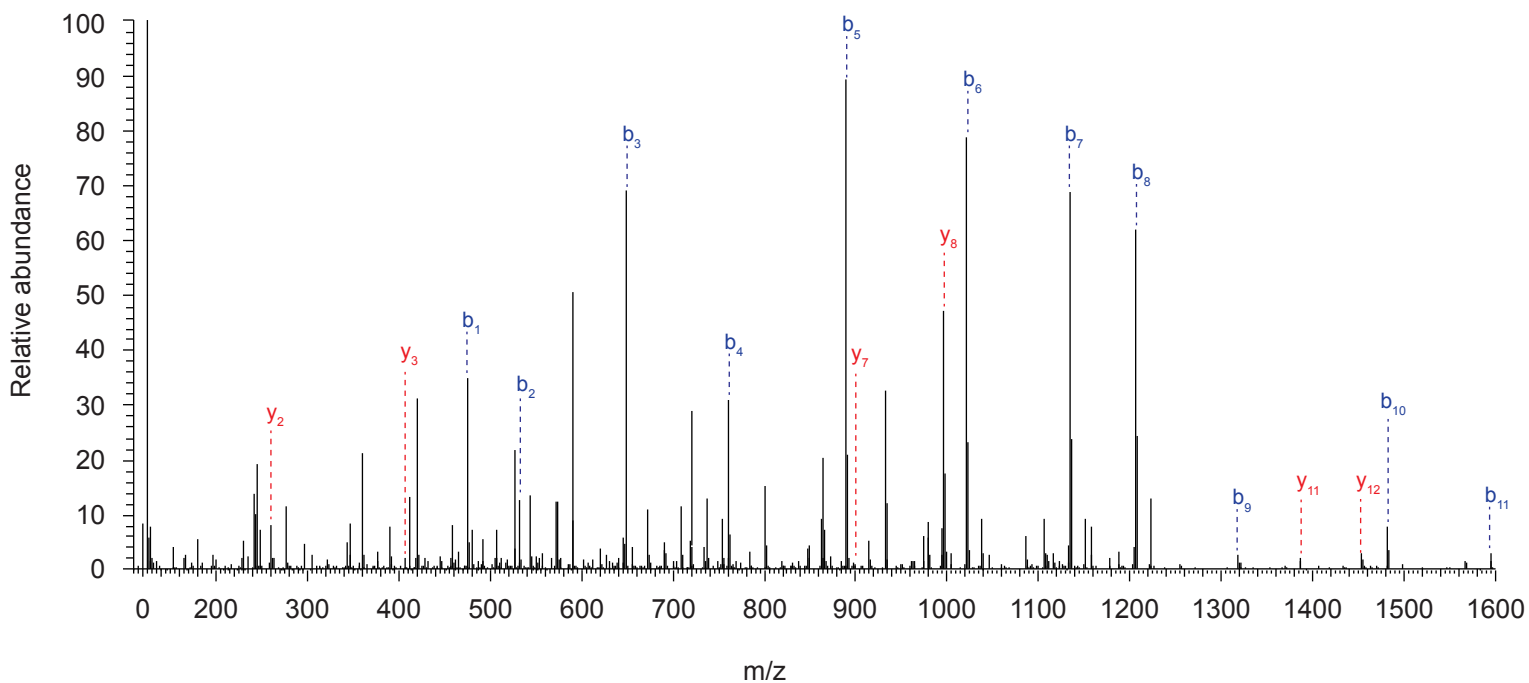

| SEQUENCE | #  | b: Δ ERROR | b        | y        | y: Δ ERROR | +1 |
|----------|----|------------|----------|----------|------------|----|
| D        | 1  | 0.580      | 420.241  | ---      | ---        | 19 |
| L        | 2  | 0.594      | 533.325  | 2170.992 | ---        | 18 |
| D        | 3  | 0.447      | 648.352  | 2057.908 | ---        | 17 |
| L        | 4  | 0.357      | 761.436  | 1942.881 | ---        | 16 |
| E        | 5  | 0.384      | 890.479  | 1829.797 | ---        | 15 |
| M        | 6  | 0.496      | 1021.520 | 1700.755 | ---        | 14 |
| L        | 7  | 0.699      | 1134.604 | 1569.714 | ---        | 13 |
| A        | 8  | 0.857      | 1205.641 | 1456.630 | -2.143     | 12 |
| P#       | 9  | 2.396      | 1318.688 | 1385.593 | 1.627      | 11 |
| Y        | 10 | 1.161      | 1481.752 | 1272.545 | ---        | 10 |
| I        | 11 | 0.952      | 1594.836 | 1109.482 | 1.742      | 9  |
| P        | 12 | ---        | 1691.889 | 996.398  | 0.611      | 8  |
| M*       | 13 | ---        | 1838.924 | 899.345  | -0.579     | 7  |
| D        | 14 | ---        | 1953.951 | 752.310  | 0.036      | 6  |
| D        | 15 | ---        | 2068.978 | 637.283  | 1.809      | 5  |
| D        | 16 | ---        | 2184.005 | 522.256  | -1.482     | 4  |
| F        | 17 | ---        | 2331.073 | 407.229  | -0.412     | 3  |
| Q        | 18 | ---        | 2459.132 | 260.160  | 0.738      | 2  |
| L        | 19 | ---        | ---      | 132.102  | 1.793      | 1  |

**d** Representative steady state kinetic plots for PHD2 HIF-1 $\alpha$  peptide titrations

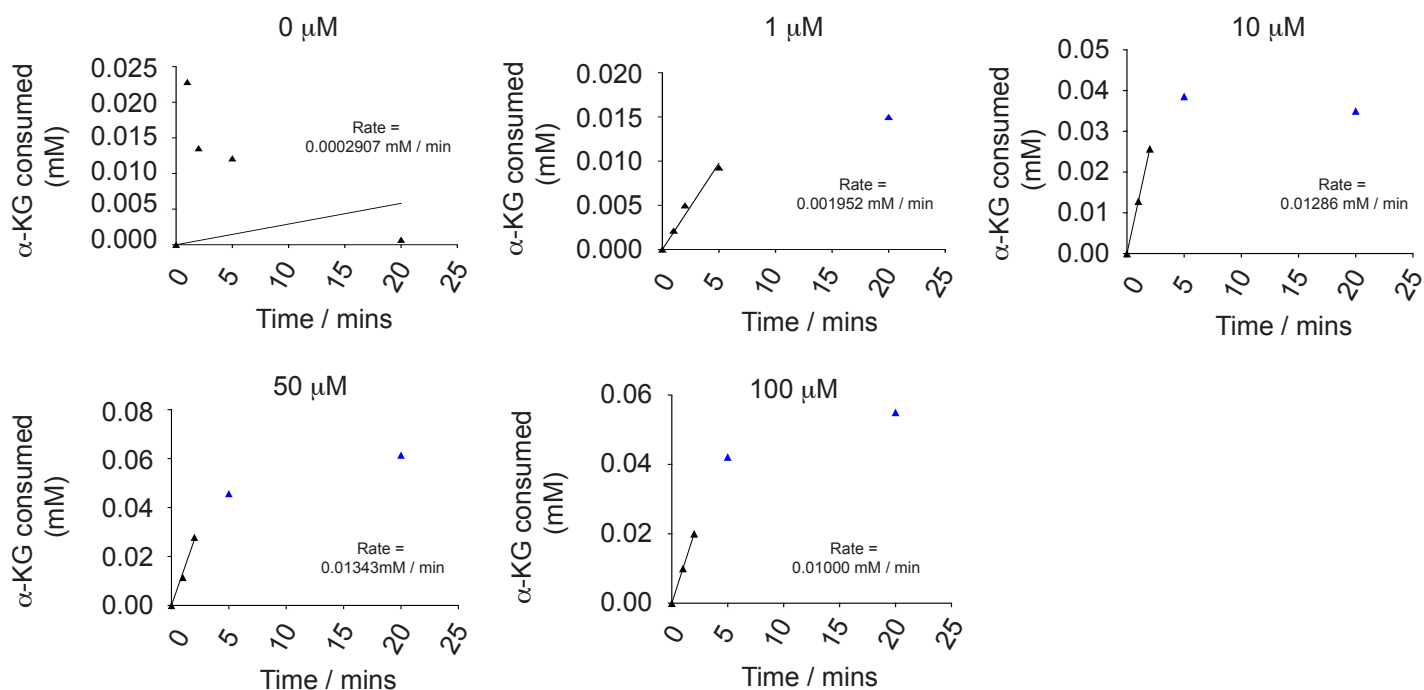

**e** Representative steady state kinetic plots for PHD2 HIF-1 $\alpha$  peptide  $\alpha$ -KG titrations

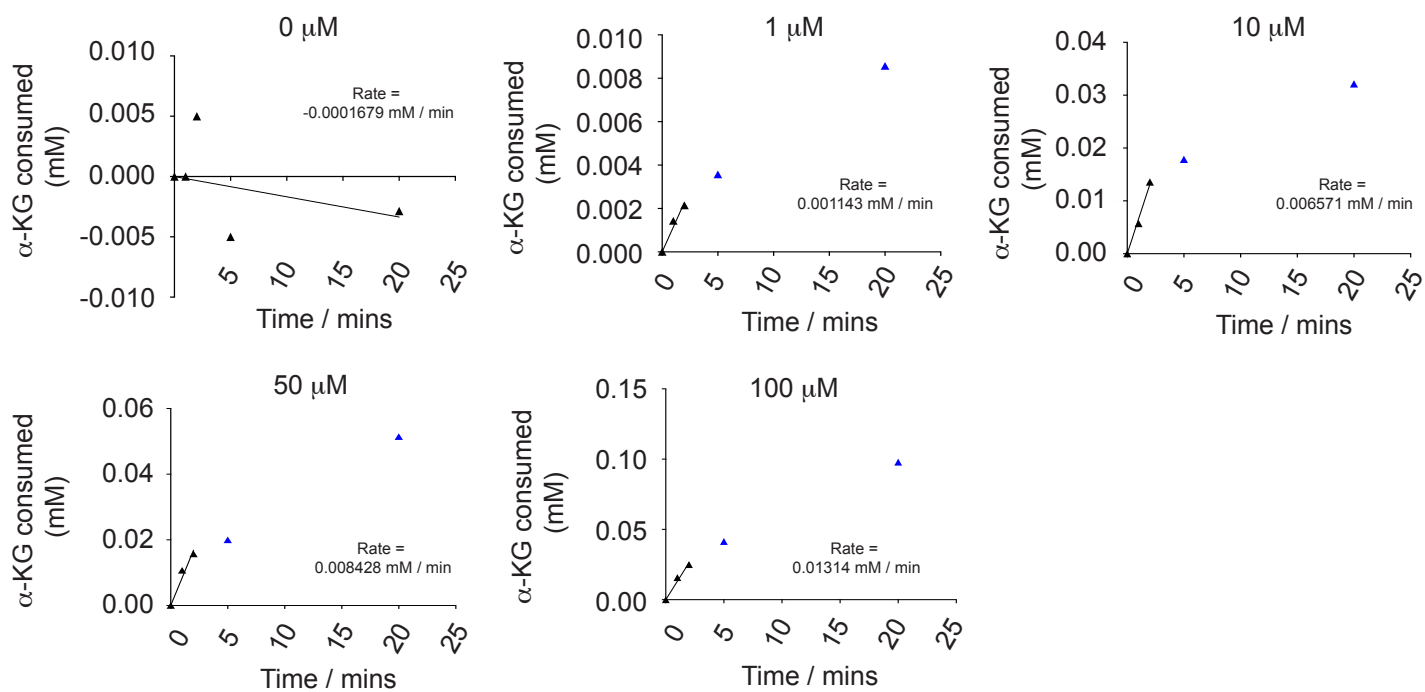

### Supplementary Figure S4

(a) Increasing concentrations of PHD2 were added to 100  $\mu\text{M}$  P564 peptide and 0.5 mM  $\alpha$ -ketoglutarate. For all negative controls, 0.5 mM  $\alpha$ -ketoglutarate, 100  $\mu\text{M}$  P564 peptide and 3  $\mu\text{M}$  of PHD2 were used unless otherwise indicated. (b) Tandem Mass Tag (TMT) reporter ion signal of hydroxylated HIF-1 $\alpha$  P564 peptide from complete reaction and negative controls. (c) Representative mass spectra of hydroxylated HIF-1 $\alpha$  peptides. (Top panel) Detected peptide fragments, with high intensity species labelled. “b” fragments (blue) are N-terminal amino acid fragments of the peptide, and “y” fragments (red) are C-terminal amino acid fragments of the peptide. (Bottom panel) The tabulated numbers denote measured fragment masses. Reactions were set up in an identical manner to (a), with the exception of 250  $\mu\text{M}$  of peptide, to generate the TMT signals and mass spectra (#: hydroxylation, \*: oxidation). (d) Representative time course kinetic data for various concentrations of P564 peptide and PHD2. Increasing concentrations of HIF-1 $\alpha$  peptide (P564) added to saturating concentrations of all other reagents. (e) Representative time course kinetic data for various concentrations of  $\alpha$ -ketoglutarate. Increasing concentrations of  $\alpha$ -ketoglutarate were added to saturating concentrations of all other reagents, 100  $\mu\text{M}$  peptide substrate and 3  $\mu\text{M}$  of PHD2.

Representative steady state kinetic plots for PHD3 HIF-1 $\alpha$  peptide titrations

**a**

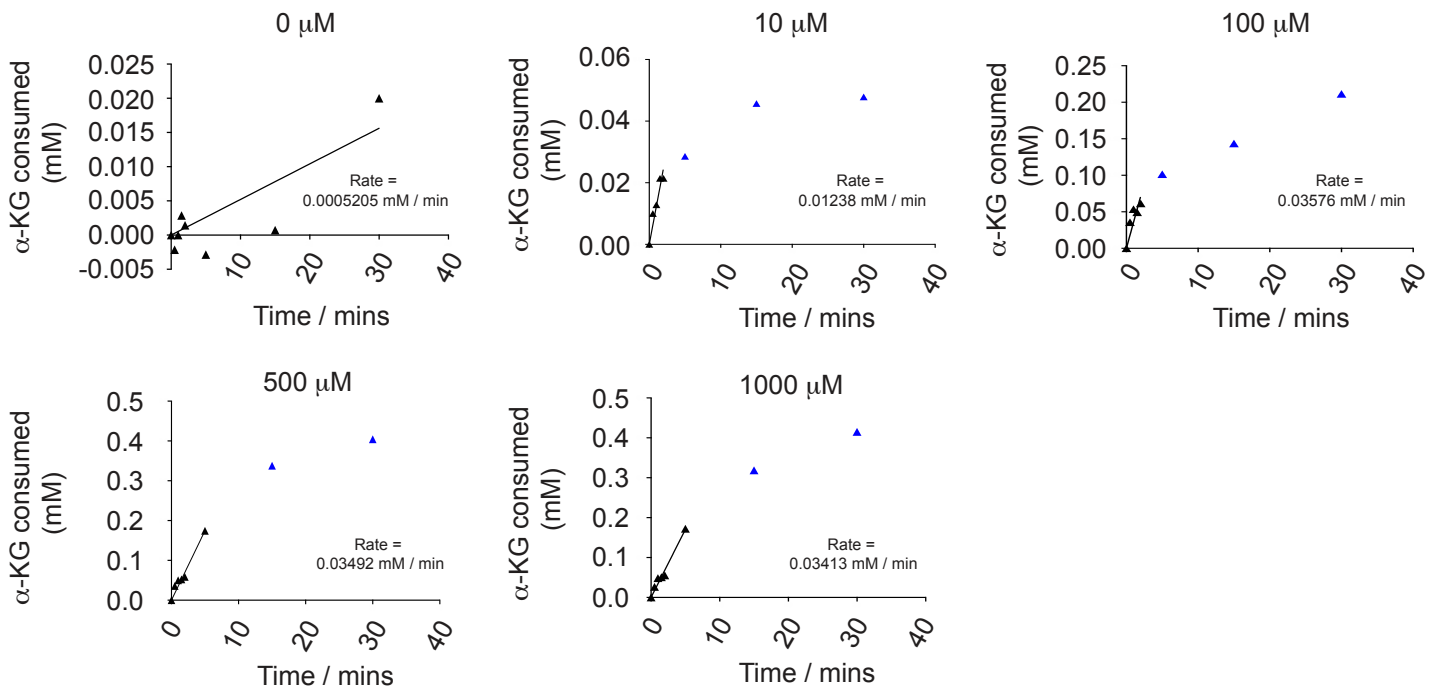

Representative steady state kinetic plots for PHD3 HIF-1 $\alpha$  peptide  $\alpha$ -ketoglutarate titrations

**b**

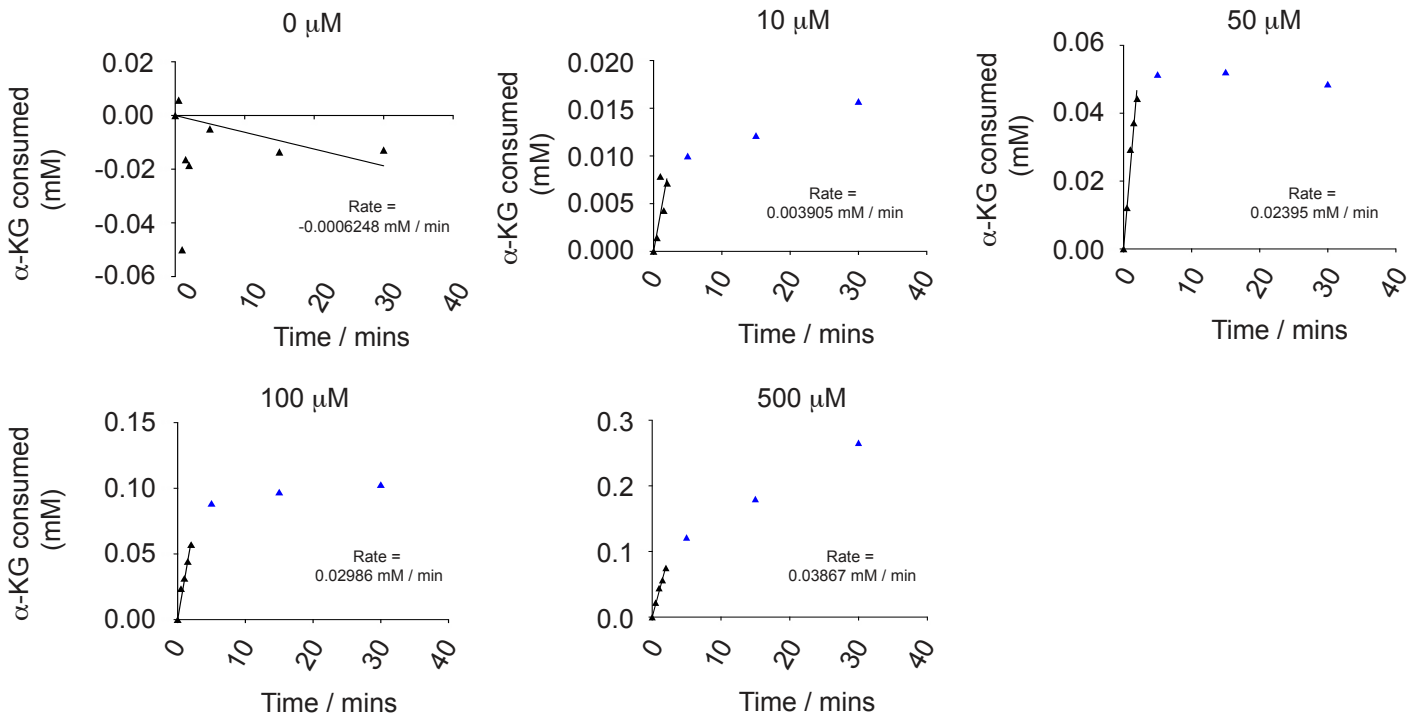



### **Supplementary Figure S5**

(a) Representative time course kinetic data for various concentrations of P564 peptide and PHD3. Increasing concentrations of HIF-1 $\alpha$  peptide (P564) added to saturating concentrations of all other reagents. (b) Representative time course kinetic data for various concentrations of  $\alpha$ -ketoglutarate. Increasing concentrations of  $\alpha$ -ketoglutarate were added to saturating concentrations of all other reagents, 100  $\mu$ M peptide substrate and 10  $\mu$ M of PHD3.

Representative steady state kinetic plots for PHD3 ACC2 peptide titrations

**a**

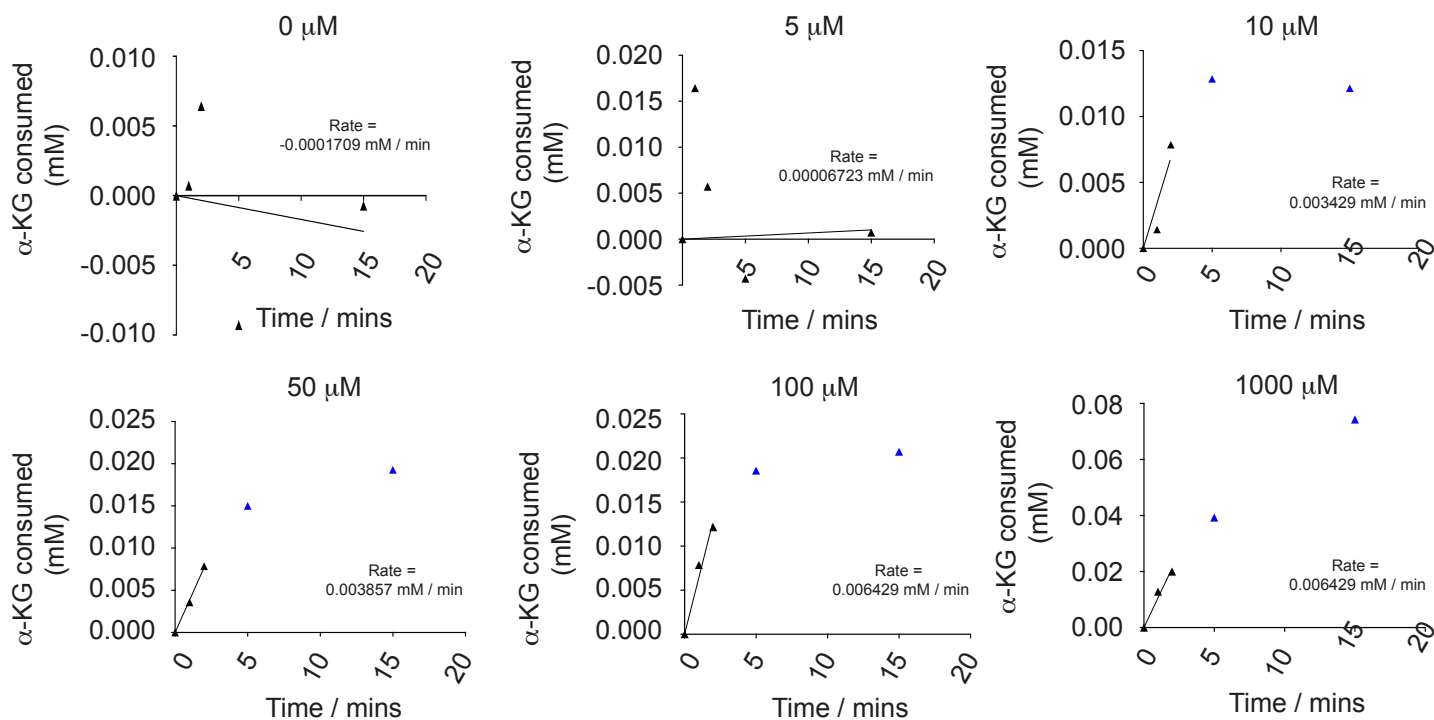

**b**

Hydroxylated ACC2 P450 peptide

Non-hydroxylated ACC2 P450 peptide

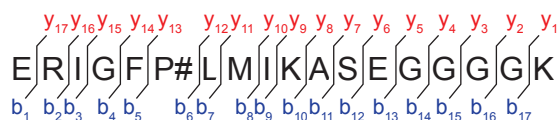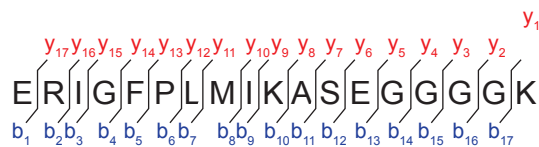

| SEQUENCE | #  | B: $\Delta$ ERROR | B        | Y        | Y: $\Delta$ ERROR | +1 |
|----------|----|-------------------|----------|----------|-------------------|----|
| E        | 1  | ---               | 130.050  | ---      | ---               | 18 |
| R        | 2  | 0.180             | 286.151  | 1733.937 | ---               | 17 |
| I        | 3  | ---               | 399.235  | 1577.836 | ---               | 16 |
| G        | 4  | 6.338             | 456.257  | 1464.752 | ---               | 15 |
| F        | 5  | 2.780             | 603.325  | 1407.730 | ---               | 14 |
| P#       | 6  | ---               | 716.373  | 1260.662 | ---               | 13 |
| L        | 7  | -0.367            | 829.457  | 1147.614 | 5.675             | 12 |
| M        | 8  | 0.681             | 960.497  | 1034.530 | 1.653             | 11 |
| I        | 9  | -0.375            | 1073.581 | 903.489  | 0.089             | 10 |
| K        | 10 | 6.986             | 1201.676 | 790.405  | -0.184            | 9  |
| A        | 11 | ---               | 1272.713 | 662.310  | -0.968            | 8  |
| S        | 12 | ---               | 1359.745 | 591.273  | -11.813           | 7  |
| E        | 13 | ---               | 1488.788 | 504.241  | 1.189             | 6  |
| G        | 14 | ---               | 1545.809 | 375.199  | 0.515             | 5  |
| G        | 15 | ---               | 1602.831 | 318.177  | -0.225            | 4  |
| G        | 16 | ---               | 1659.852 | 261.156  | -2.457            | 3  |
| G        | 17 | ---               | 1716.874 | 204.134  | 0.942             | 2  |
| K        | 18 | ---               | ---      | 147.113  | -1.012            | 1  |

| SEQUENCE | #  | B: $\Delta$ ERROR | B        | Y        | Y: $\Delta$ ERROR | +1 |
|----------|----|-------------------|----------|----------|-------------------|----|
| E        | 1  | ---               | 130.050  | ---      | ---               | 18 |
| R        | 2  | -1.207            | 286.151  | 1717.942 | ---               | 17 |
| I        | 3  | ---               | 399.235  | 1561.841 | ---               | 16 |
| G        | 4  | 6.070             | 456.257  | 1448.757 | ---               | 15 |
| F        | 5  | -1.165            | 603.325  | 1391.735 | ---               | 14 |
| P        | 6  | -7.408            | 700.378  | 1244.667 | ---               | 13 |
| L        | 7  | -0.473            | 813.462  | 1147.614 | 2.803             | 12 |
| M        | 8  | -1.913            | 944.502  | 1034.530 | 0.473             | 11 |
| I        | 9  | -1.149            | 1057.586 | 903.489  | -1.060            | 10 |
| K        | 10 | 1.967             | 1185.681 | 790.405  | -0.570            | 9  |
| A        | 11 | ---               | 1256.718 | 662.310  | -1.337            | 8  |
| S        | 12 | ---               | 1343.750 | 591.273  | -0.664            | 7  |
| E        | 13 | ---               | 1472.793 | 504.241  | -0.385            | 6  |
| G        | 14 | ---               | 1529.814 | 375.199  | -1.356            | 5  |
| G        | 15 | ---               | 1586.836 | 318.177  | -0.129            | 4  |
| G        | 16 | ---               | 1643.857 | 261.156  | -0.353            | 3  |
| G        | 17 | ---               | 1700.879 | 204.134  | -1.675            | 2  |
| K        | 18 | ---               | ---      | 147.113  | 0.336             | 1  |

**Supplementary Figure S6**

(a) Representative time course kinetic data for various concentrations of P450 peptide and PHD3. Increasing concentrations of ACC2 peptide (P450) were added to saturating concentrations of all other reagents and 10  $\mu$ M of PHD3. (b) Representative mass spectra of hydroxylated and non-hydroxylated ACC2 P450 peptides. The tabulated numbers denote the peptide masses detected. “b” fragments (blue) are N-terminal amino acid fragments of the peptide, and “y” fragments (red) are C-terminal amino acid fragments of the peptide. 250  $\mu$ M of peptide was incubated with (left panel) and without (right panel) 10  $\mu$ M PHD3 to generate the mass spectra above.

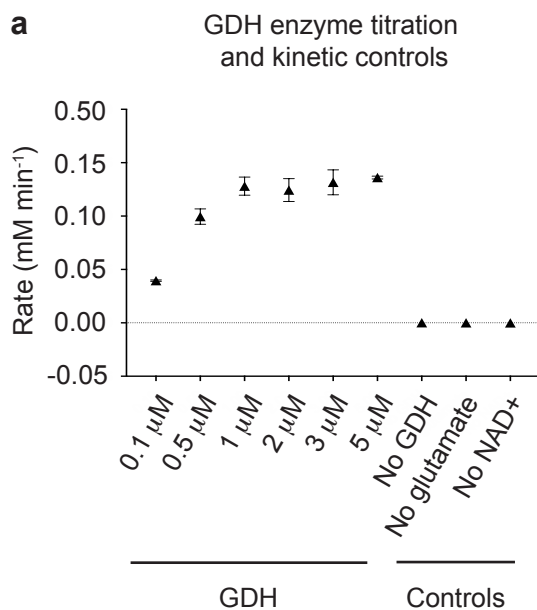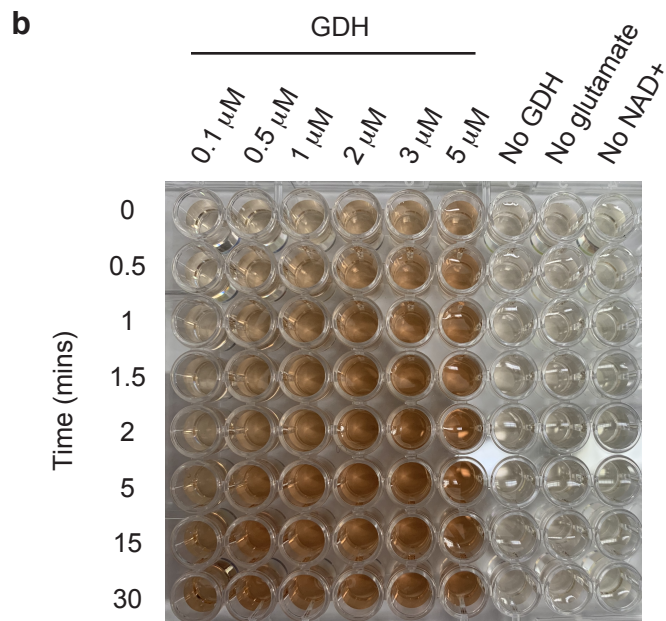

### Supplementary Figure S7

(a) Increasing concentrations of GDH were added to 5 mM L-glutamate and 2.5 mM NAD<sup>+</sup>. For all negative controls, 5 mM L-glutamate, 2.5 mM NAD<sup>+</sup> and 5 μM GDH were used unless otherwise indicated. (b) Qualitative observation of the time course experiments used to generate part (a). Plotted data represent 3 independent replicates. GDH, Glutamate Dehydrogenase; NAD<sup>+</sup>, nicotinamide adenine dinucleotide.
